# Supplementary material
Source: MDPI journal article supplement (https://www.mdpi.com/1660-3397/11/9/3350)
Supplement: s2 [file s2]

marinedrugs-11-03350-s001.mol
  ChemDraw12021317222D

 52 59  0  0  0  0  0  0  0  0999 V2000
   -3.9157   -0.8552    0.0000 C   0  0  0  0  0  0  0  0  0  0  0  0
   -3.9157   -1.6802    0.0000 C   0  0  0  0  0  0  0  0  0  0  0  0
   -3.2013   -2.0927    0.0000 C   0  0  0  0  0  0  0  0  0  0  0  0
   -2.4868   -1.6802    0.0000 C   0  0  0  0  0  0  0  0  0  0  0  0
   -3.2013   -0.4427    0.0000 C   0  0  0  0  0  0  0  0  0  0  0  0
   -1.7723    0.3823    0.0000 C   0  0  0  0  0  0  0  0  0  0  0  0
   -2.4868    0.7948    0.0000 C   0  0  0  0  0  0  0  0  0  0  0  0
   -3.2013    0.3823    0.0000 C   0  0  0  0  0  0  0  0  0  0  0  0
   -1.0579    0.7948    0.0000 C   0  0  0  0  0  0  0  0  0  0  0  0
   -0.3434    0.3823    0.0000 C   0  0  0  0  0  0  0  0  0  0  0  0
    0.3711    0.7948    0.0000 C   0  0  0  0  0  0  0  0  0  0  0  0
    1.0856    1.2073    0.0000 C   0  0  0  0  0  0  0  0  0  0  0  0
    1.6689    1.7907    0.0000 C   0  0  0  0  0  0  0  0  0  0  0  0
    1.2991    0.4104    0.0000 C   0  0  0  0  0  0  0  0  0  0  0  0
    2.0960    0.1969    0.0000 C   0  0  0  0  0  0  0  0  0  0  0  0
    2.6793    0.7803    0.0000 C   0  0  0  0  0  0  0  0  0  0  0  0
    2.4658    1.5772    0.0000 C   0  0  0  0  0  0  0  0  0  0  0  0
    1.4981    1.9218    0.0000 C   0  0  0  0  0  0  0  0  0  0  0  0
    1.2991   -0.4146    0.0000 C   0  0  0  0  0  0  0  0  0  0  0  0
   -0.3434    1.2073    0.0000 N   0  0  0  0  0  0  0  0  0  0  0  0
   -0.5569    2.0042    0.0000 C   0  0  0  0  0  0  0  0  0  0  0  0
    0.0265    2.5876    0.0000 C   0  0  0  0  0  0  0  0  0  0  0  0
    0.8515    2.5876    0.0000 C   0  0  0  0  0  0  0  0  0  0  0  0
    1.0650    3.3845    0.0000 C   0  0  0  0  0  0  0  0  0  0  0  0
   -0.3860    3.3021    0.0000 C   0  0  0  0  0  0  0  0  0  0  0  0
   -2.0743   -0.9657    0.0000 C   0  0  0  0  0  0  0  0  0  0  0  0
   -1.2774   -1.1792    0.0000 C   0  0  0  0  0  0  0  0  0  0  0  0
   -1.2774   -2.0042    0.0000 C   0  0  0  0  0  0  0  0  0  0  0  0
   -1.4909   -2.8011    0.0000 C   0  0  0  0  0  0  0  0  0  0  0  0
   -0.9076   -3.3845    0.0000 C   0  0  0  0  0  0  0  0  0  0  0  0
   -0.1931   -2.9720    0.0000 C   0  0  0  0  0  0  0  0  0  0  0  0
    0.0204   -2.1751    0.0000 C   0  0  0  0  0  0  0  0  0  0  0  0
    0.8454   -2.1751    0.0000 C   0  0  0  0  0  0  0  0  0  0  0  0
    2.1241   -0.5246    0.0000 C   0  0  0  0  0  0  0  0  0  0  0  0
    0.9554   -1.4876    0.0000 C   0  0  0  0  0  0  0  0  0  0  0  0
    1.4288   -2.0297    0.0000 C   0  0  0  0  0  0  0  0  0  0  0  0
    2.2538   -1.9334    0.0000 C   0  0  0  0  0  0  0  0  0  0  0  0
    2.5366   -1.1290    0.0000 C   0  0  0  0  0  0  0  0  0  0  0  0
    2.8372   -2.5168    0.0000 C   0  0  0  0  0  0  0  0  0  0  0  0
    3.3335   -0.9155    0.0000 O   0  0  0  0  0  0  0  0  0  0  0  0
   -2.4868    1.6198    0.0000 C   0  0  0  0  0  0  0  0  0  0  0  0
   -3.7846   -2.6760    0.0000 O   0  0  0  0  0  0  0  0  0  0  0  0
   -2.6179   -2.6760    0.0000 C   0  0  0  0  0  0  0  0  0  0  0  0
   -2.4868   -0.8552    0.0000 O   0  0  0  0  0  0  0  0  0  0  0  0
   -0.4805   -1.7907    0.0000 O   0  0  0  0  0  0  0  0  0  0  0  0
    0.7157   -0.1729    0.0000 H   0  0  0  0  0  0  0  0  0  0  0  0
    1.7523   -1.2741    0.0000 O   0  0  0  0  0  0  0  0  0  0  0  0
    0.9554   -0.8694    0.0000 O   0  0  0  0  0  0  0  0  0  0  0  0
   -2.0743   -2.3946    0.0000 O   0  0  0  0  0  0  0  0  0  0  0  0
    3.5032    0.7811    0.0000 C   0  0  0  0  0  0  0  0  0  0  0  0
    3.9157    1.4956    0.0000 O   0  0  0  0  0  0  0  0  0  0  0  0
    3.9157    0.0666    0.0000 O   0  0  0  0  0  0  0  0  0  0  0  0
  1  2  1  0      
  2  3  1  0      
  3  4  1  0      
  5  1  1  0      
  6  7  1  0      
  7  8  1  0      
  8  5  1  0      
  6  9  1  0      
  9 10  1  0      
 10 11  1  0      
 11 12  1  0      
 12 14  1  0      
 14 15  1  0      
 15 16  2  0      
 16 17  1  0      
 17 13  1  0      
 12 13  1  1      
 12 18  1  6      
 14 19  1  0      
 11 20  2  0      
 20 21  1  0      
 21 22  1  0      
 22 23  1  0      
 23 24  1  1      
 22 25  1  6      
  4 26  1  0      
 26 27  1  0      
 27 28  1  0      
 28 29  1  0      
 29 30  1  0      
 30 31  1  0      
 31 32  1  0      
 32 33  1  0      
 19 34  1  0      
 33 35  1  0      
 35 36  1  0      
 36 37  1  0      
 34 38  1  0      
 38 37  1  0      
 37 39  1  6      
 38 40  1  6      
  7 41  2  0      
  3 42  1  6      
  3 43  1  1      
  4 44  1  6      
  5 44  1  1      
 32 45  1  1      
 14 46  1  1      
 35 47  1  6      
 34 47  1  6      
 35 48  1  1      
 19 48  1  1      
  4 49  1  6      
 28 45  1  6      
 28 49  1  6      
 23 18  1  0      
 16 50  1  0      
 50 51  2  0      
 50 52  1  0      
M  STY  1   1 SUP
M  SLB  1   1   1
M  SAL   1  3  50  51  52
M  SBL   1  1  57
M  SMT   1 CO2H
M  SBV   1 57   -3.4774    7.4644
M  END
