# Supplementary material for: Cytotoxicity, Fractionation and Dereplication of Extracts of the Dinoflagellate Vulcanodinium rugosum, a Producer of Pinnatoxin G
Source: MDPI journal article supplement (doi:10.3390/md11093350), 2013-09-02
Supplement: s3 [file s3]

marinedrugs-11-03350-s002.mol
  corina  12171322173D 1   1.00000     0.00000 
CORINA 3.49 0023  12.04.2013
 51 58  0  0  0  0  0  0  0  0999 V2000
   -0.0186    1.5195    0.0104 C   0  0  0  0  0  0  0  0  0  0  0  0
    0.0021   -0.0041    0.0020 C   0  0  0  0  0  0  0  0  0  0  0  0
    0.9151   -0.5439    1.1088 C   0  0  0  0  0  0  0  0  0  0  0  0
    2.2837    0.1225    0.9800 C   0  0  0  0  0  0  0  0  0  0  0  0
    1.3988    2.0974   -0.0000 C   0  0  0  0  0  0  0  0  0  0  0  0
    3.2458    5.2869   -0.2976 C   0  0  0  0  0  0  0  0  0  0  0  0
    2.2280    4.3059   -0.8152 C   0  0  0  0  0  0  0  0  0  0  0  0
    1.3038    3.6172    0.1583 C   0  0  0  0  0  0  0  0  0  0  0  0
    3.4648    6.4382   -1.2764 C   0  0  0  0  0  0  0  0  0  0  0  0
    4.9374    6.8605   -1.2246 C   0  0  0  0  0  0  0  0  0  0  0  0
    5.5901    6.5475   -2.5655 C   0  0  0  0  0  0  0  0  0  0  0  0
    7.0694    6.7107   -2.6605 C   0  0  0  0  0  0  0  0  0  0  0  0
    7.4891    7.6188   -1.4587 C   0  0  0  0  0  0  0  0  0  0  0  0
    7.7976    5.4028   -2.3735 C   0  0  0  0  0  0  0  0  0  0  0  0
    9.2811    5.6075   -2.4604 C   0  0  0  0  0  0  0  0  0  0  0  0
    9.7881    6.7769   -2.0821 C   0  0  0  0  0  0  0  0  0  0  0  0
    8.9777    7.9209   -1.5664 C   0  0  0  0  0  0  0  0  0  0  0  0
   11.2465    6.9504   -2.1765 C   0  0  0  0  0  0  0  0  0  0  0  0
    7.5333    7.4530   -3.8917 C   0  0  0  0  0  0  0  0  0  0  0  0
    7.2155    4.1481   -2.9225 C   0  0  0  0  0  0  0  0  0  0  0  0
    4.8532    6.1893   -3.4979 N   0  0  0  0  0  0  0  0  0  0  0  0
    5.0397    5.8305   -4.8731 C   0  0  0  0  0  0  0  0  0  0  0  0
    5.8593    6.8722   -5.6337 C   0  0  0  0  0  0  0  0  0  0  0  0
    7.3238    6.7329   -5.2076 C   0  0  0  0  0  0  0  0  0  0  0  0
    8.2200    7.3660   -6.2785 C   0  0  0  0  0  0  0  0  0  0  0  0
    5.7312    6.6264   -7.1397 C   0  0  0  0  0  0  0  0  0  0  0  0
    3.2643   -0.4071    2.0304 C   0  0  0  0  0  0  0  0  0  0  0  0
    4.6013   -0.5464    1.2726 C   0  0  0  0  0  0  0  0  0  0  0  0
    4.2621   -0.2289   -0.1925 C   0  0  0  0  0  0  0  0  0  0  0  0
    4.8117   -1.3265   -1.1013 C   0  0  0  0  0  0  0  0  0  0  0  0
    4.3044   -1.0996   -2.5282 C   0  0  0  0  0  0  0  0  0  0  0  0
    4.0875    0.3952   -2.7723 C   0  0  0  0  0  0  0  0  0  0  0  0
    5.0824    1.2112   -1.9415 C   0  0  0  0  0  0  0  0  0  0  0  0
    6.4993    0.7289   -2.2391 C   0  0  0  0  0  0  0  0  0  0  0  0
    7.6948    3.5328   -4.2343 C   0  0  0  0  0  0  0  0  0  0  0  0
    7.3958    1.8492   -2.7529 C   0  0  0  0  0  0  0  0  0  0  0  0
    8.8628    1.3678   -2.7613 C   0  0  0  0  0  0  0  0  0  0  0  0
    9.7537    2.5511   -3.1282 C   0  0  0  0  0  0  0  0  0  0  0  0
    9.1982    3.3190   -4.3190 C   0  0  0  0  0  0  0  0  0  0  0  0
   11.1517    2.0295   -3.4760 C   0  0  0  0  0  0  0  0  0  0  0  0
    9.4874    2.5777   -5.5143 O   0  0  0  0  0  0  0  0  0  0  0  0
    2.1277    4.0391   -2.0976 C   0  0  0  0  0  0  0  0  0  0  0  0
    1.0573   -1.9626    0.9468 O   0  0  0  0  0  0  0  0  0  0  0  0
    0.3085   -0.2481    2.4821 C   0  0  0  0  0  0  0  0  0  0  0  0
    2.1362    1.5406    1.0964 O   0  0  0  0  0  0  0  0  0  0  0  0
    4.8075    1.0365   -0.5513 O   0  0  0  0  0  0  0  0  0  0  0  0
    7.6465    5.2939   -1.2432 H   0  0  0  0  0  0  0  0  0  0  0  0
    7.0918    2.2003   -4.1217 O   0  0  0  0  0  0  0  0  0  0  0  0
    7.3043    3.0487   -1.9689 O   0  0  0  0  0  0  0  0  0  0  0  0
    2.8364   -0.1887   -0.3031 O   0  0  0  0  0  0  0  0  0  0  0  0
   11.8039    8.0998   -1.8110 C   0  0  0  0  0  0  0  0  0  0  0  0
  1  2  1  0      
  2  3  1  0      
  3  4  1  0      
  5  1  1  0      
  6  7  1  0      
  7  8  1  0      
  8  5  1  0      
  6  9  1  0      
  9 10  1  0      
 10 11  1  0      
 11 12  1  0      
 12 14  1  0      
 14 15  1  0      
 15 16  2  0      
 16 17  1  0      
 17 13  1  0      
 16 18  1  0      
 12 13  1  0      
 12 19  1  0      
 14 20  1  0      
 11 21  2  0      
 21 22  1  0      
 22 23  1  0      
 23 24  1  0      
 24 25  1  0      
 23 26  1  0      
  4 27  1  0      
 27 28  1  0      
 28 29  1  0      
 29 30  1  0      
 30 31  1  0      
 31 32  1  0      
 32 33  1  0      
 33 34  1  0      
 20 35  1  0      
 34 36  1  0      
 36 37  1  0      
 37 38  1  0      
 35 39  1  0      
 39 38  1  0      
 38 40  1  0      
 39 41  1  0      
  7 42  2  0      
  3 43  1  0      
  3 44  1  0      
  4 45  1  0      
  5 45  1  0      
 33 46  1  0      
 14 47  1  0      
 36 48  1  0      
 35 48  1  0      
 36 49  1  0      
 20 49  1  0      
  4 50  1  0      
 29 46  1  0      
 29 50  1  0      
 18 51  2  0      
 24 19  1  0      
M  END
$$$$
