# Supplementary material for: Cytotoxicity, Fractionation and Dereplication of Extracts of the Dinoflagellate Vulcanodinium rugosum, a Producer of Pinnatoxin G
Source: MDPI journal article supplement (doi:10.3390/md11093350), 2013-09-02
Supplement: s4 [file s4]

marinedrugs-11-03350-s002.mol
  ChemDraw12021317232D

 51 58  0  0  0  0  0  0  0  0999 V2000
   -3.9163   -0.8552    0.0000 C   0  0  0  0  0  0  0  0  0  0  0  0
   -3.9163   -1.6802    0.0000 C   0  0  0  0  0  0  0  0  0  0  0  0
   -3.2018   -2.0927    0.0000 C   0  0  0  0  0  0  0  0  0  0  0  0
   -2.4873   -1.6802    0.0000 C   0  0  0  0  0  0  0  0  0  0  0  0
   -3.2018   -0.4427    0.0000 C   0  0  0  0  0  0  0  0  0  0  0  0
   -1.7729    0.3823    0.0000 C   0  0  0  0  0  0  0  0  0  0  0  0
   -2.4873    0.7948    0.0000 C   0  0  0  0  0  0  0  0  0  0  0  0
   -3.2018    0.3823    0.0000 C   0  0  0  0  0  0  0  0  0  0  0  0
   -1.0584    0.7948    0.0000 C   0  0  0  0  0  0  0  0  0  0  0  0
   -0.3439    0.3823    0.0000 C   0  0  0  0  0  0  0  0  0  0  0  0
    0.3705    0.7948    0.0000 C   0  0  0  0  0  0  0  0  0  0  0  0
    1.0850    1.2073    0.0000 C   0  0  0  0  0  0  0  0  0  0  0  0
    1.6684    1.7907    0.0000 C   0  0  0  0  0  0  0  0  0  0  0  0
    1.2985    0.4104    0.0000 C   0  0  0  0  0  0  0  0  0  0  0  0
    2.0954    0.1969    0.0000 C   0  0  0  0  0  0  0  0  0  0  0  0
    2.6788    0.7803    0.0000 C   0  0  0  0  0  0  0  0  0  0  0  0
    2.4653    1.5772    0.0000 C   0  0  0  0  0  0  0  0  0  0  0  0
    3.5038    0.7803    0.0000 C   0  0  0  0  0  0  0  0  0  0  0  0
    1.4975    1.9218    0.0000 C   0  0  0  0  0  0  0  0  0  0  0  0
    1.2985   -0.4146    0.0000 C   0  0  0  0  0  0  0  0  0  0  0  0
   -0.3439    1.2073    0.0000 N   0  0  0  0  0  0  0  0  0  0  0  0
   -0.5575    2.0042    0.0000 C   0  0  0  0  0  0  0  0  0  0  0  0
    0.0259    2.5876    0.0000 C   0  0  0  0  0  0  0  0  0  0  0  0
    0.8509    2.5876    0.0000 C   0  0  0  0  0  0  0  0  0  0  0  0
    1.0644    3.3845    0.0000 C   0  0  0  0  0  0  0  0  0  0  0  0
   -0.3866    3.3021    0.0000 C   0  0  0  0  0  0  0  0  0  0  0  0
   -2.0748   -0.9657    0.0000 C   0  0  0  0  0  0  0  0  0  0  0  0
   -1.2780   -1.1792    0.0000 C   0  0  0  0  0  0  0  0  0  0  0  0
   -1.2780   -2.0042    0.0000 C   0  0  0  0  0  0  0  0  0  0  0  0
   -1.4915   -2.8011    0.0000 C   0  0  0  0  0  0  0  0  0  0  0  0
   -0.9081   -3.3845    0.0000 C   0  0  0  0  0  0  0  0  0  0  0  0
   -0.1936   -2.9720    0.0000 C   0  0  0  0  0  0  0  0  0  0  0  0
    0.0199   -2.1751    0.0000 C   0  0  0  0  0  0  0  0  0  0  0  0
    0.8449   -2.1751    0.0000 C   0  0  0  0  0  0  0  0  0  0  0  0
    2.1235   -0.5246    0.0000 C   0  0  0  0  0  0  0  0  0  0  0  0
    0.9549   -1.4876    0.0000 C   0  0  0  0  0  0  0  0  0  0  0  0
    1.4282   -2.0297    0.0000 C   0  0  0  0  0  0  0  0  0  0  0  0
    2.2532   -1.9334    0.0000 C   0  0  0  0  0  0  0  0  0  0  0  0
    2.5360   -1.1290    0.0000 C   0  0  0  0  0  0  0  0  0  0  0  0
    2.8366   -2.5168    0.0000 C   0  0  0  0  0  0  0  0  0  0  0  0
    3.3329   -0.9155    0.0000 O   0  0  0  0  0  0  0  0  0  0  0  0
   -2.4873    1.6198    0.0000 C   0  0  0  0  0  0  0  0  0  0  0  0
   -3.7852   -2.6760    0.0000 O   0  0  0  0  0  0  0  0  0  0  0  0
   -2.6185   -2.6760    0.0000 C   0  0  0  0  0  0  0  0  0  0  0  0
   -2.4873   -0.8552    0.0000 O   0  0  0  0  0  0  0  0  0  0  0  0
   -0.4811   -1.7907    0.0000 O   0  0  0  0  0  0  0  0  0  0  0  0
    0.7152   -0.1729    0.0000 H   0  0  0  0  0  0  0  0  0  0  0  0
    1.7518   -1.2741    0.0000 O   0  0  0  0  0  0  0  0  0  0  0  0
    0.9549   -0.8694    0.0000 O   0  0  0  0  0  0  0  0  0  0  0  0
   -2.0748   -2.3946    0.0000 O   0  0  0  0  0  0  0  0  0  0  0  0
    3.9163    1.4948    0.0000 C   0  0  0  0  0  0  0  0  0  0  0  0
  1  2  1  0      
  2  3  1  0      
  3  4  1  0      
  5  1  1  0      
  6  7  1  0      
  7  8  1  0      
  8  5  1  0      
  6  9  1  0      
  9 10  1  0      
 10 11  1  0      
 11 12  1  0      
 12 14  1  0      
 14 15  1  0      
 15 16  2  0      
 16 17  1  0      
 17 13  1  0      
 16 18  1  0      
 12 13  1  1      
 12 19  1  6      
 14 20  1  0      
 11 21  2  0      
 21 22  1  0      
 22 23  1  0      
 23 24  1  0      
 24 25  1  1      
 23 26  1  6      
  4 27  1  0      
 27 28  1  0      
 28 29  1  0      
 29 30  1  0      
 30 31  1  0      
 31 32  1  0      
 32 33  1  0      
 33 34  1  0      
 20 35  1  0      
 34 36  1  0      
 36 37  1  0      
 37 38  1  0      
 35 39  1  0      
 39 38  1  0      
 38 40  1  6      
 39 41  1  6      
  7 42  2  0      
  3 43  1  6      
  3 44  1  1      
  4 45  1  6      
  5 45  1  1      
 33 46  1  1      
 14 47  1  1      
 36 48  1  6      
 35 48  1  6      
 36 49  1  1      
 20 49  1  1      
  4 50  1  6      
 29 46  1  6      
 29 50  1  6      
 18 51  2  0      
 24 19  1  0      
M  END
